# Supplementary material
Source: PubMed Central journal article supplement (PMC3463775)
Supplement: NIHMS402013-supplement-Supp_Data.pdf [file NIHMS402013-supplement-Supp_Data.pdf]

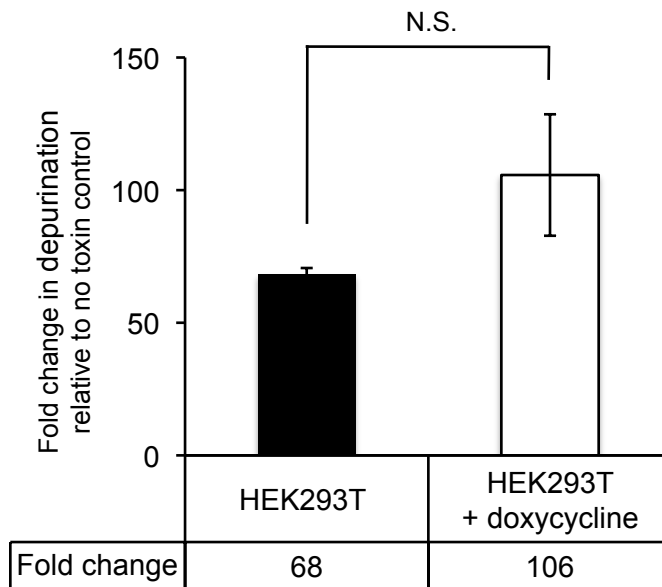

**Figure S1. Effect of doxycycline treatment alone on ricin-dependent depurination in parental HEK293T cells.** HEK293T cells were pre-treated with or without doxycycline (0.1  $\mu\text{g}/\text{ml}$  for 96 h), followed by treatment with 0.4 nM ricin for 60 minutes. Data indicate the fold change in depurination relative to untreated (no toxin) cells and represent the mean  $\pm$  SD of triplicate reactions from two independent experiments. N.S. (not significant) indicates  $P > 0.05$ , as analyzed by a student's paired, two-tailed  $t$  test.
